# Supplementary material for: Sequence Relationships among C. elegans, D. melanogaster and Human microRNAs Highlight the Extensive Conservation of microRNAs in Biology
Source: PubMed Central journal article supplement (PMC2486268; doi:10.1371/journal.pone.0002818), 2008-07-30

### cel-lin-4, cel-miR-87:

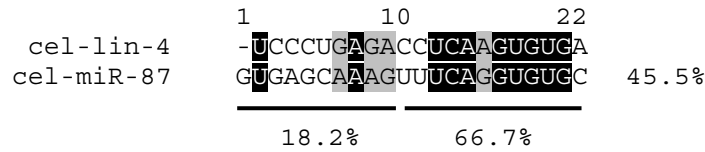

### cel-miR-90, cel-miR-124:

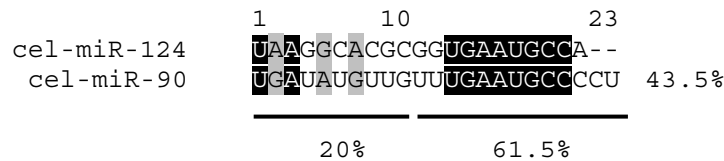

It should be noted that the cel-miR-90\_cel-miR-124 3' block of identity is conserved to some extent in miRNAs cel-miR-80, cel-miR-81, cel-miR-82 and cel-miR-234.

Alignment of 3' end sequences:

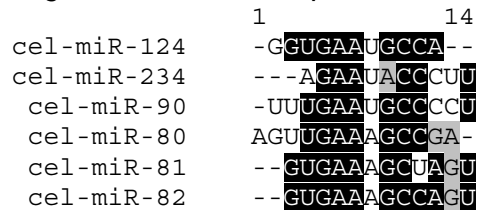

Interestingly the human miRNA hsa-miR-124, counterpart of *C. elegans* cel-miR-124, has extensive 3' sequence similarity to hsa-miR-377\*.

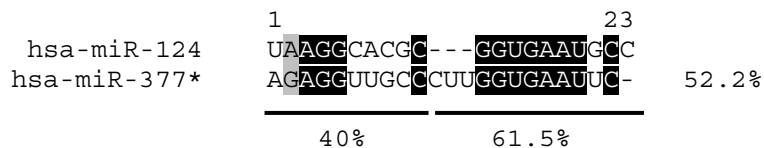

### cel-miR-81, cel-miR-799:

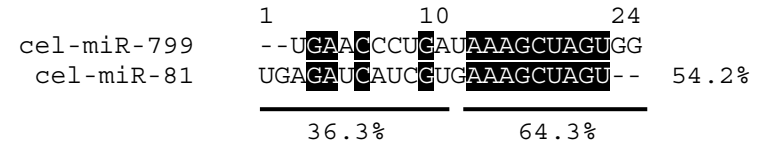

It should be noted that the cel-miR-799\_cel-miR-81 3' block of identity is conserved to some extent in *C. elegans* miRNAs cel-miR-80 and cel-miR-82, and in human miRNA hsa-miR-208a.

Alignment of 3' end sequences:

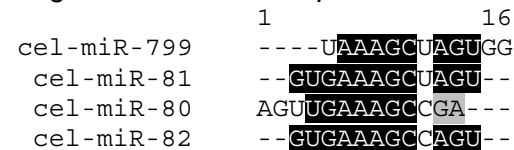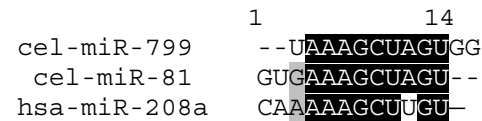

In turn, human miRNA hsa-miR-208a is 3'-related to human miRNAs hsa-miR-129-3p and hsa-miR-129\*.

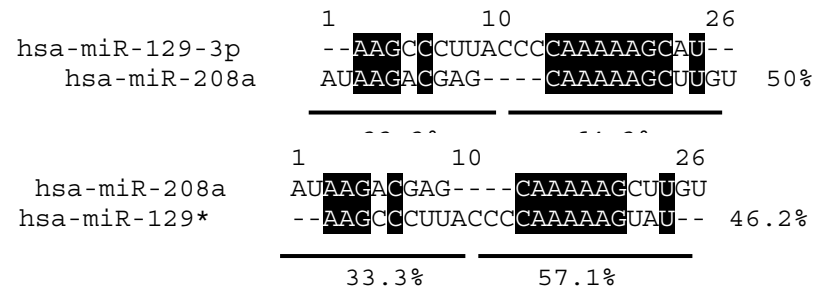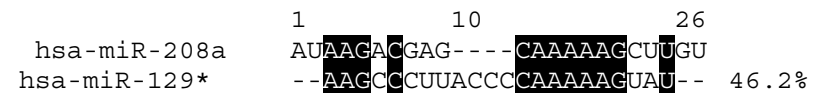

**cel-miR-70, cel-miR-52, cel-miR-53, cel-miR-229  
and cel-miR-272:**

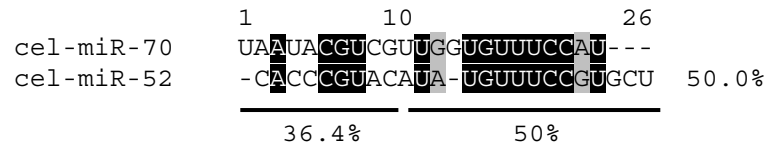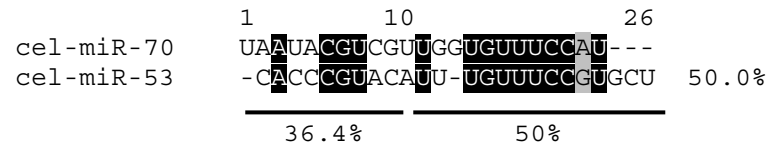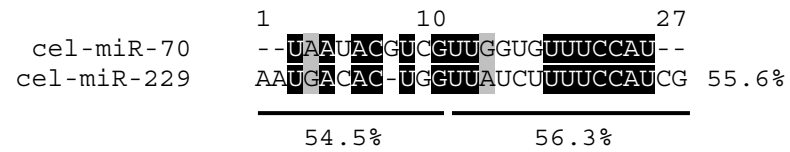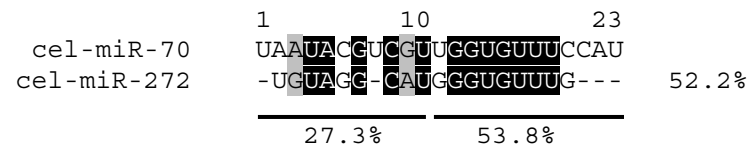

Supplement: pone.0002818.s003.pdf [file pone.0002818.s003.pdf]
