# Supplementary material for: Sequence Relationships among C. elegans, D. melanogaster and Human microRNAs Highlight the Extensive Conservation of microRNAs in Biology
Source: PubMed Central journal article supplement (PMC2486268; doi:10.1371/journal.pone.0002818), 2008-07-30
Supplement: pone.0002818.s001.pdf [file pone.0002818.s001.pdf]

## cel-let-7:

```
1                               24
cel-let-7    UGAGGUAG-UA- GGUUGUAUAGUU
dme-let-7    UGAGGUAG-UA- GGUUGUAUAGU-
hsa-let-7a   UGAGGUAG-UA- GGUUGUAUAGUU
hsa-let-7b   UGAGGUAG-UA- GGUUGUCUCGUU
hsa-let-7c   UGAGGUAG-UA- GGUUGUAUCGUU
hsa-let-7d   AGAGGUAG-UA- GGUUGCAUAGUU
hsa-let-7e   UGAGGUAG-GA- GGUUGUAUAGUU
hsa-let-7g   UGAGGUAG-UA- GUUUGUACAGUU
hsa-let-7f   UGAGGUAG-UA- GAUUGUAUAGUU
dme-miR-984  UGAGGUAAAUACCGGUUGGAAUUU-
cel-miR-84   UGAGGUAG-UA- UGUAAUAUUGUA
hsa-miR-98   UGAGGUAG-UA- AGUUGUAUUGUU
hsa-let-7i   UGAGGUAG-UA- GUUUGUCUCGUU
```

```
1
cel-let-7    -UGAGGUAGUA-
cel-miR-84   -UGAGGUAGUA-
dme-let-7    -UGAGGUAGUA-
hsa-let-7a   -UGAGGUAGUA-
hsa-let-7b   -UGAGGUAGUA-
hsa-let-7c   -UGAGGUAGUA-
hsa-let-7d   -AGAGGUAGUA-
hsa-let-7e   -UGAGGUAG-GA-
hsa-let-7f   -UGAGGUAGUA-
hsa-let-7g   -UGAGGUAGUA-
hsa-let-7i   -UGAGGUAGUA-
hsa-miR-98   -UGAGGUAGUA-
cel-miR-241  -UGAGGUAGCU-
cel-miR-48   -UGAGGUAGGC-
cel-miR-793  -UGAGGUAUCU-
cel-miR-794  -UGAGGUAAAUC-
cel-miR-795  -UGAGGUAGAU-
dme-miR-984  -UGAGGUAAAU-
hsa-miR-196a --UAGGUAGUUU
hsa-miR-196b --UAGGUAGUUU
dme-miR-963 ACAAGGUAAA--
dme-miR-977 -UGAGAUAUUC-
```

## cel-lin-4:

```
1                               24
cel-lin-4    UCCCUGAGACCUC---AAGUGUGA
hsa-miR-125a-5p UCCCUGAGACCCUUUAACCUGUGA
dme-miR-125   UCCCUGAGACCCU--AACUUGUGA
hsa-miR-125b   UCCCUGAGACCCU--AACUUGUGA
```

```
1
cel-lin-4    -UCCCUGAGAC
dme-miR-125  -UCCCUGAGAC
hsa-miR-125a-5p -UCCCUGAGAC
hsa-miR-125b  -UCCCUGAGAC
cel-miR-237   -UCCCUGAGAA
hsa-miR-331-3p GCCCCUGGGC-
```

## cel-miR-1:

```
1                               22
cel-miR-1    UGGAAUGUAAAGAAGUAUGUA-
hsa-miR-1    UGGAAUGUAAAGAAGUAUGUAU
dme-miR-1    UGGAAUGUAAAGAAGUAUGGAG
cel-miR-256  UGGAAUGCAUAGAAGACUGUA-
hsa-miR-206  UGGAAUGUAAGGAAGUGUGUGG
```

```
1                               10
cel-miR-1    UGGAAUGUAA
dme-miR-1    UGGAAUGUAA
hsa-miR-1    UGGAAUGUAA
hsa-miR-206  UGGAAUGUAA
cel-miR-796  UGGAAUGUAG
cel-miR-256  UGGAAUGCAU
hsa-miR-122  UGGAGUGUGA
```

### cel-miR-2:

```
1
cel-miR-2      --UAUCACAGCC
cel-miR-250   --AAUCACAGUC
dme-miR-308   --AAUCACAGGA
dme-miR-11    --CAUCACAGUC
hsa-miR-499-3p AACAUACACAG--
cel-miR-43    --UAUCACAGUU
dme-miR-6     --UAUCACAGUG
cel-miR-797   --UAUCACAGCA
dme-miR-13a   --UAUCACAGCC
dme-miR-13b   --UAUCACAGCC
dme-miR-2a    --UAUCACAGCC
dme-miR-2b    --UAUCACAGCC
dme-miR-2c    --UAUCACAGCC
```

### cel-miR-34:

```
1                               27
cel-miR-34   --AGGCAGUGUGG--UUAGCUGGUUG--
dme-miR-34   --UGGCAGUGUGG--UUAGCUGGUUGUG
hsa-miR-34a   --UGGCAGUGUC---UUAGCUGGUUGU-
hsa-miR-34b*  UAGGCAGUGUCA--UUAGCUGAUUG--
hsa-miR-34c-5p --AGGCAGUGUAG--UUAGCUGAUUGC-
hsa-miR-449a  --UGGCAGUGUAUUGUUAGCUGGU----
hsa-miR-449b  --AGGCAGUGUAUUGUUAGCUGGC----
```

```
1
cel-miR-34   --AGGCAGUGUG
dme-miR-34   --UGGCAGUGUG
hsa-miR-34a   --UGGCAGUGUC
hsa-miR-34b*  UAGGCAGUGU-
hsa-miR-34c-5p --AGGCAGUGUA
hsa-miR-449a  --UGGCAGUGUA
hsa-miR-449b  --AGGCAGUGUA
```

### cel-miR-43:

```
1
cel-miR-43   --UAUCACAGUU--
cel-miR-2    --UAUCACAGCC--
dme-miR-6    --UAUCACAGUG--
```

```
cel-miR-797   --UAUCACAGCA--
dme-miR-13a   --UAUCACAGCC--
dme-miR-2a    --UAUCACAGCC--
dme-miR-2b    --UAUCACAGCC--
dme-miR-2c    --UAUCACAGCC--
dme-miR-13b   --UAUCACAGCC--
cel-miR-250   --AAUCACAGUC--
dme-miR-308   --AAUCACAGGA--
dme-miR-11    --CAUCACAGUC--
hsa-miR-499-3p AACAUACACAG----
hsa-miR-27a   ---UUCACAGUGG-
hsa-miR-27b   ---UUCACAGUGG-
hsa-miR-128   ----UCACAGUGAA
hsa-miR-768-3p ----UCACAUGCU
```

### cel-miR-44:

```
1
cel-miR-44   --UGACUAGAGA
cel-miR-45   --UGACUAGAGA
cel-miR-247   --UGACUAGAGC
hsa-miR-134   UGUGACUGGU--
dme-miR-996   --UGACUAGAUU
hsa-miR-708*  --CAACUAGACU
dme-miR-279   --UGACUAGAUC
cel-miR-61    --UGACUAGAAC
dme-miR-286   --UGACUAGACC
```

### cel-miR-45:

```
1
cel-miR-45   --UGACUAGAGA
cel-miR-44   --UGACUAGAGA
cel-miR-247   --UGACUAGAGC
hsa-miR-134   UGUGACUGGU--
dme-miR-996   --UGACUAGAUU
hsa-miR-708*  --CAACUAGACU
dme-miR-279   --UGACUAGAUC
cel-miR-61    --UGACUAGAAC
dme-miR-286   --UGACUAGACC
```

### cel-miR-48:

```
1
cel-miR-48 -UGAGGUAGGC
cel-let-7 -UGAGGUAGUA
dme-let-7 -UGAGGUAGUA
cel-miR-84 -UGAGGUAGUA
hsa-let-7a -UGAGGUAGUA
hsa-let-7b -UGAGGUAGUA
hsa-let-7c -UGAGGUAGUA
hsa-let-7d -UGAGGUAGUA
hsa-let-7e -UGAGGUAGUA
hsa-let-7f -UGAGGUAGUA
hsa-let-7g -UGAGGUAGUA
hsa-let-7i -UGAGGUAGUA
hsa-miR-98 -UGAGGUAGUA
cel-miR-795 -UGAGGUAGUA
cel-miR-241 -UGAGGUAGCU
cel-miR-793 -UGAGGUAGUCU
cel-miR-794 -UGAGGUAGUC
dme-miR-984 -UGAGGUAGUA
dme-miR-963 ACAAGGUAGAA-
dme-miR-977 -UGAGGUAGUC
```

### cel-miR-49:

```
1 10
cel-miR-49 AAGCACCACG
hsa-miR-593* AGGCACCAGC
hsa-miR-21* CAACACCAGU
cel-miR-83 UAGCACCAUA
dme-miR-995 UAGCACCAUA
dme-miR-285 UAGCACCAUA
hsa-miR-29b UAGCACCAUA
hsa-miR-29c UAGCACCAUA
dme-miR-998 UAGCACCAUG
hsa-miR-29a UAGCACCAUC
```

### cel-miR-50:

```
1 24
cel-miR-50 UGAUAUGUCUGUAUUCUUGG--
dme-miR-190 AGAUAUGUUUGAUUUCUUGGUUG
hsa-miR-190 UGAUAUGUUUGAUUAUUCGU--
hsa-miR-190b UGAUAUGUUUGAUUAUUCGU--
```

```
1 10
cel-miR-50 UGAUAUGUCU
cel-miR-62 UGAUAUGUAA
cel-miR-90 UGAUAUGUUG
dme-miR-190 AGAUAUGUUU
hsa-miR-190 UGAUAUGUUU
hsa-miR-190b UGAUAUGUUU
```

### cel-miR-51:

```
1
cel-miR-51 UACCCGUAGC--
cel-miR-52 CACCCGUACA--
cel-miR-53 CACCCGUACA--
cel-miR-54 UACCCGUAAU--
cel-miR-55 UACCCGUAAU--
cel-miR-56 UACCCGUAAU--
dme-miR-100 AACCCGUAAA--
hsa-miR-100 AACCCGUAGA--
hsa-miR-99a AACCCGUAGA--
hsa-miR-99b CACCCGUAGA--
cel-miR-273 UGCCCGUACU--
cel-miR-267 --CCCGUGAAGU
```

### cel-miR-52:

```
1 10
cel-miR-273 UGCCCGUACU
cel-miR-54 UACCCGUAAU
cel-miR-56 UACCCGUAAU
cel-miR-51 UACCCGUAGC
cel-miR-55 UACCCGUAAU
cel-miR-52 CACCCGUACA
cel-miR-53 CACCCGUACA
hsa-miR-99b CACCCGUAGA
dme-miR-100 AACCCGUAAA
hsa-miR-100 AACCCGUAGA
hsa-miR-99a AACCCGUAGA
```

### cel-miR-53:

```
1           10
cel-miR-273  UGCCCGUACU
cel-miR-54   UACCCGUAAU
cel-miR-56   UACCCGUAAU
cel-miR-51   UACCCGUAGC
cel-miR-55   UACCCGUAUA
cel-miR-52   CACCCGUACA
cel-miR-53   CACCCGUACA
hsa-miR-99b  CACCCGUACA
dme-miR-100  AACCCGUAAA
hsa-miR-100  AACCCGUAGA
hsa-miR-99a  AACCCGUAGA
```

### cel-miR-54:

```
1
cel-miR-267  --CCCGUAAGU
dme-miR-100  AACCCGUAAA--
cel-miR-273  UGCCCGUACU--
cel-miR-360  UGACCGUAAU--
cel-miR-54   UACCCGUAAU--
cel-miR-56   UACCCGUAAU--
cel-miR-51   UACCCGUAGC--
cel-miR-55   UACCCGUAUA--
cel-miR-52   CACCCGUACA--
cel-miR-53   CACCCGUACA--
hsa-miR-99b  CACCCGUACA--
hsa-miR-100  AACCCGUACA--
hsa-miR-99a  AACCCGUACA--
```

### cel-miR-55:

```
1           10
cel-miR-273  UGCCCGUACU
cel-miR-54   UACCCGUAAU
cel-miR-56   UACCCGUAAU
cel-miR-51   UACCCGUAGC
cel-miR-55   UACCCGUAUA
cel-miR-52   CACCCGUACA
cel-miR-53   CACCCGUACA
hsa-miR-99b  CACCCGUAGA
```

```
dme-miR-100  AACCCGUAAA
hsa-miR-100  AACCCGUAGA
hsa-miR-99a  AACCCGUAGA
```

### cel-miR-56:

```
1
cel-miR-267  --CCCGUAAGU
dme-miR-100  AACCCGUAAA--
cel-miR-273  UGCCCGUACU--
cel-miR-360  UGACCGUAAU--
cel-miR-54   UACCCGUAAU--
cel-miR-56   UACCCGUAAU--
cel-miR-51   UACCCGUAGC--
cel-miR-55   UACCCGUAUA--
cel-miR-52   CACCCGUACA--
cel-miR-53   CACCCGUACA--
hsa-miR-99b  CACCCGUACA--
hsa-miR-100  AACCCGUACA--
hsa-miR-99a  AACCCGUACA--
```

### cel-miR-57:

```
1
cel-miR-57   UACCCGUAG-
hsa-miR-10a  UACCCGUAG-
hsa-miR-10b  UACCCGUAG-
dme-miR-10   -ACCCGUAGA
hsa-miR-146b-3p  UGCCCGUGG-
```

### cel-miR-58:

```
1
cel-miR-58   --UGAGAUCGUU-
cel-miR-80   --UGAGAUCAUU-
cel-miR-81   --UGAGAUCAUC-
cel-miR-82   --UGAGAUCAUC-
dme-bantam   --UGAGAUCAUU-
hsa-miR-450b-3p  -UUGGAUCAU--
cel-miR-1018  AGAGAUCAU---
cel-miR-1022  ---AAGAUCAUUG
dme-miR-306*  --GGGGUCACU-
```

### cel-miR-61:

```
1
cel-miR-61    --UGACUAGAAC
cel-miR-247   --UGACUAGAGC
cel-miR-44    --UGACUAGAGA
cel-miR-45    --UGACUAGAGA
dme-miR-279   --UGACUAGAUC
dme-miR-286   --UGACUAGACC
dme-miR-996   --UGACUAGAUU
hsa-miR-134   UGUGACUCGU--
hsa-miR-708*  --CAACUAGACU
```

### cel-miR-62

```
1           10
cel-miR-62   UGAUAUGUAA
cel-miR-50   UGAUAUGUCU
cel-miR-90   UGAUAUGUUG
hsa-miR-190  UGAUAUGUUU
dme-miR-190  AGAUAUGUUU
hsa-miR-190b UGAUAUGUUU
```

### cel-miR-63:

```
1
cel-miR-63   UAUGACACUG--
cel-miR-64   UAUGACACUG--
cel-miR-65   UAUGACACUG--
cel-miR-66   CAUGACACUG--
cel-miR-229  AAUGACACUG--
cel-miR-228  AAUGCACACUG--
cel-miR-790  CUUGCACACUC--
cel-miR-791  UUUGCACACUC--
dme-miR-263b CUUGCACACUG--
hsa-miR-183  UAUGCACACUG--
hsa-miR-200a --UAACACUGUC
hsa-miR-514  AUUGACACUU--
hsa-miR-96   UUUGCACUA--
```

### cel-miR-64:

```
1
cel-miR-64   UAUGACACUG--
cel-miR-63   UAUGACACUG--
cel-miR-65   UAUGACACUG--
cel-miR-66   CAUGACACUG--
cel-miR-229  AAUGACACUG--
cel-miR-228  AAUGGCACUG--
cel-miR-790  CUUGGCACUC--
cel-miR-791  UUUGGCACUC--
dme-miR-263b CUUGGCACUG--
hsa-miR-183  UAUGGCACUG--
hsa-miR-200a --UAACACUGUC
hsa-miR-514  AUUGACACUU--
hsa-miR-96   UUUGGCACUA--
```

### cel-miR-65:

```
1
cel-miR-65   UAUGACACUG--
cel-miR-64   UAUGACACUG--
cel-miR-63   UAUGACACUG--
cel-miR-66   CAUGACACUG--
cel-miR-229  AAUGACACUG--
cel-miR-228  AAUGGCACUG--
cel-miR-790  CUUGGCACUC--
cel-miR-791  UUUGGCACUC--
dme-miR-263b CUUGGCACUG--
hsa-miR-183  UAUGGCACUG--
hsa-miR-200a --UAACACUGUC
hsa-miR-514  AUUGACACUU--
hsa-miR-96   UUUGGCACUA--
```

### cel-miR-66:

```
1
cel-miR-66 CAUGACACUG--
cel-miR-65 UAUGACACUG--
cel-miR-64 UAUGACACUG--
cel-miR-63 UAUGACACUG--
cel-miR-229 AAUGACACUG--
cel-miR-228 AAUGACACUG--
cel-miR-790 CUUGACACUC--
cel-miR-791 UUGACACUC--
dme-miR-263b CUUGACACUG--
hsa-miR-183 UAUGACACUG--
hsa-miR-200a --UAACACUGUC
hsa-miR-514 AUUGACACUU--
hsa-miR-96 UUGACACUA--
```

### cel-miR-72:

```
1 23
cel-miR-72 AGGCAAGAUGUUGGCAUAGCUGA
hsa-miR-31 AGGCAAGAUGCUGGCAUAGCU--
cel-miR-266 AGGCAAGACUUGGCAAGC---
dme-miR-31a UGGCAAGAUGUCGGCAUAGCUGA
dme-miR-31b UGGCAAGAUGUCGGAUAGCUG--
```

```
1
cel-miR-72 AGGCAAGAUG-
cel-miR-73 UGGCAAGAUG-
dme-miR-31a UGGCAAGAUG-
dme-miR-31b UGGCAAGAUG-
hsa-miR-31 AGGCAAGAUG-
cel-miR-74 UGGCAAGAAA-
cel-miR-266 AGGCAAGACU-
cel-miR-268 -GGCAAGAAUU
cel-miR-269 -GGCAAGACUC
```

### cel-miR-73:

```
1
cel-miR-73 UGGCAAGAUG-
cel-miR-74 UGGCAAGAAA-
cel-miR-72 AGGCAAGAUG-
dme-miR-31a UGGCAAGAUG-
dme-miR-31b UGGCAAGAUG-
hsa-miR-31 AGGCAAGAUG-
cel-miR-266 AGGCAAGACU-
cel-miR-269 -GGCAAGACUC
cel-miR-268 -GGCAAGAAUU
```

### cel-miR-74:

```
1
cel-miR-74 -UGGCAAGAAA--
cel-miR-73 -UGGCAAGAUG--
cel-miR-72 -AGGCAAGAUG--
cel-miR-266 -AGGCAAGACU--
cel-miR-268 --GGCAAGAAUU-
cel-miR-269 --GGCAAGACUC-
dme-miR-31a -UGGCAAGAUG--
dme-miR-31b -UGGCAAGAUG--
hsa-miR-31 -AGGCAAGAUG--
hsa-miR-513b UUCACAAGGA---
hsa-miR-873 ---GCAGGAACUU
```

### cel-miR-75:

```
1
cel-miR-75 -UAAAAGCUAC-
dme-miR-79 --UAAAAGCUAGA
cel-miR-79 -AUAAGCUAG-
dme-miR-4 -AUAAGCUAG-
hsa-miR-9* -AUAAGCUAG-
hsa-miR-320 --AAAAGCUGGG
hsa-miR-548a-3p --CAAACUGGC
dme-miR-281-1* AAGAGAGCUG--
dme-miR-281-2* AAGAGAGCUA--
```

### cel-miR-79:

```
1                               23
cel-miR-79  AUAAGCUAGUUACCAAGCU-
dme-miR-79  -UAAAGCUAGAUACCAAGCAU
hsa-miR-9*  AUAAGCUAGAUACCAGAAAGU-
```

```
1
cel-miR-79  --AUAAGCUAG-
cel-miR-75  --UUAAGCUAC-
hsa-miR-9*  --AUAAGCUAG-
dme-miR-4   --AUAAGCUAG-
dme-miR-79  ---UAAAGCUAGA
hsa-miR-340 UUAUAAGCA---
dme-miR-281-1* -AACAGAGCUG--
dme-miR-281-2* -AACAGAGCUA--
hsa-miR-320 ---AAAAGCUGG
dme-miR-7   -UGGAGACUA--
hsa-miR-548a-3p ---CAAAACUGGC
hsa-miR-7   -UGGAGACUA--
```

### cel-miR-80:

```
1
cel-miR-80  --UGAGAUCAUU-
dme-bantam  --UGAGAUCAUU-
cel-miR-81  --UGAGAUCAUC-
cel-miR-82  --UGAGAUCAUC-
cel-miR-58  --UGAGAUCAUU-
cel-miR-1022 ---AAGAUAUUG
cel-miR-1018 AGAGAGAUCA---
dme-miR-306* --CGCGUCACU-
hsa-miR-450b-3p -UUGCGAUCAU--
```

### cel-miR-81:

```
1
cel-miR-81  --UGAGAUCAUC-
cel-miR-82  --UGAGAUCAUC-
cel-miR-80  --UGAGAUCAUU-
dme-bantam  --UGAGAUCAUU-
cel-miR-58  --UGAGAUCAUU-
```

```
cel-miR-1022 ---AAGAUAUUG
cel-miR-1018 AGAGAGAUCA---
dme-miR-306* --GGGGUCACU-
hsa-miR-450b-3p -UUGGGAUCAU--
```

### cel-miR-82:

```
1
cel-miR-82  --UGAGAUCAUC-
cel-miR-81  --UGAGAUCAUC-
cel-miR-80  --UGAGAUCAUU-
dme-bantam  --UGAGAUCAUU-
cel-miR-58  --UGAGAUCAUU-
cel-miR-1022 ---AAGAUAUUG
cel-miR-1018 AGAGAGAUCA---
dme-miR-306* --GGGGUCACU-
hsa-miR-450b-3p -UUGGGAUCAU--
```

### cel-miR-83:

```
1                               23
cel-miR-83  UAGCACCAUAUAAAUUCAGUAA-
dme-miR-285 UAGCACCAUUCGAAAUCAGUGC-
dme-miR-998 UAGCACCAUGAGA-UUCAGCUC-
hsa-miR-29a UAGCACCAUCUGAAAUCGGUUA-
hsa-miR-29b UAGCACCAUUUGAAAUCAGUGUU
hsa-miR-29c UAGCACCAUUUGAAAUCGGUUA-
```

```
1           10
cel-miR-83  UAGCACCAUA
dme-miR-285 UAGCACCAUU
hsa-miR-29b UAGCACCAUU
hsa-miR-29c UAGCACCAUU
dme-miR-998 UAGCACCAUG
hsa-miR-29a UAGCACCAUC
dme-miR-995 UAGCACCAUA
cel-miR-49  AAGCACCACG
hsa-miR-593* AGGCACCAGC
hsa-miR-21* CAACACCAGU
```

## cel-miR-84:

```
1                               22
cel-miR-84  UGAGGUAGUAUGUAUUUAUUGUA
cel-let-7  UGAGGUAGUAGGUUGUAUAGU
dme-let-7  UGAGGUAGUAGGUUGUAUAGU-
hsa-let-7a UGAGGUAGUAGGUUGUAUAGU
hsa-let-7b UGAGGUAGUAGGUUGUGUGUGU
hsa-let-7c UGAGGUAGUAGGUUGUAUGU
hsa-let-7e UGAGGUAGGAGGUUGUAUAGU
hsa-let-7f UGAGGUAGUAGAUUGUAUAGU
hsa-miR-98 UGAGGUAGUAAUGUGUAUUGU
```

```
1
cel-miR-84  -UGAGGUAGUA-
cel-let-7  -UGAGGUAGUA-
cel-miR-241 -UGAGGUAGGU-
cel-miR-48  -UGAGGUAGGC-
cel-miR-793 -UGAGGUUUCU-
cel-miR-794 -UGAGGUAAUC-
cel-miR-795 -UGAGGUAGAU-
dme-let-7  -UGAGGUAGUA-
dme-miR-963 ACAAGGUAAA--
dme-miR-977 -UGAGUAUUC-
dme-miR-984 -UGAGGUAAAU-
hsa-let-7a  -UGAGGUAGUA-
hsa-let-7b  -UGAGGUAGUA-
hsa-let-7c  -UGAGGUAGUA-
hsa-let-7d  -AGAGGUAGUA-
hsa-let-7e  -UGAGGUAGCA-
hsa-let-7f  -UGAGGUAGUA-
hsa-let-7g  -UGAGGUAGUA-
hsa-let-7i  -UGAGGUAGUA-
hsa-miR-196a --UAGGUAGUUU
hsa-miR-196b --UAGGUAGUUU
hsa-miR-98  -UGAGGUAGUA-
```

## cel-miR-86:

```
1
cel-miR-86  -UAAGUGAAUG
cel-miR-785 -UAAGUGAAUU
dme-miR-987 UAAAGUAAAU-
hsa-miR-559 UAAAGUAAAU-
hsa-miR-545* -UCAGUAAAUG
```

## cel-miR-90:

```
1           10
cel-miR-90  UGAUAUGUUG
dme-miR-190 AGAUAUGUUU
hsa-miR-190 UGAUAUGUUU
hsa-miR-190b UGAUAUGUUU
cel-miR-50  UGAUAUGUCU
cel-miR-62  UGAUAUGUAA
```

## cel-miR-124:

```
1                               23
cel-miR-124 UAAGGCACGCGGUGAAUGCCA--
dme-miR-124 UAAGGCACGCGGUGAAUGCCAAG
hsa-miR-124 UAAGGCACGCGGUGAAUGCC---
```

```
1           10
cel-miR-124 UAAGGCACGC
dme-miR-124 UAAGGCACGC
hsa-miR-124 UAAGGCACGC
hsa-miR-506 UAAGGCACCC
```

## cel-miR-228:

```
1                               26
cel-miR-228 ---AAUGGCACUGCAUGAAUUCACGG
dme-miR-263a GUUAAUGGCACUGGAAGAAUUCAC--
hsa-miR-183 ---UAUGGCACUGGUAGAAUUCACU-
```



```

1
cel-miR-228 AAUGCACUG--
hsa-miR-183 UAUGCACUG--
cel-miR-790 CUUGCACUC--
cel-miR-791 UUUGCACUC--
hsa-miR-96 UUUGCACUA--
dme-miR-263b CUUGCACUG--
hsa-miR-514 AUUGACACU--
cel-miR-229 AAUGACACUG--
cel-miR-63 UAUGACACUG--
cel-miR-64 UAUGACACUG--
cel-miR-65 UAUGACACUG--
cel-miR-66 CAUGACACUG--
hsa-miR-200a --UACACUGUC

1
cel-miR-228 ---AAUGGCACUG
dme-miR-263a GUUAAUGGCA---

```

### cel-miR-229:

```

1
cel-miR-229 AAUGACACUG--
cel-miR-63 UAUGACACUG--
cel-miR-64 UAUGACACUG--
cel-miR-65 UAUGACACUG--
cel-miR-66 CAUGACACUG--
hsa-miR-200a --UACACUGUC
hsa-miR-183 UAUGCACUG--
cel-miR-790 CUUGCACUC--
cel-miR-791 UUUGCACUC--
cel-miR-228 AAUGCACUG--
hsa-miR-96 UUUGCACUA--
dme-miR-263b CUUGCACUG--
hsa-miR-514 AUUGACACU--

1
cel-miR-229 ---AAUGGCACUG
dme-miR-263a GUUAAUGGCA---

```

### cel-miR-231:

```

1
cel-miR-231 --UAAGCUCGUG
cel-miR-787 --UAAGCUCGUU
dme-miR-993 --GAAGCUCGUC
hsa-miR-99a* --CAAGCUCGCU
hsa-miR-99b* --CAAGCUCGUG
hsa-miR-556-5p GAUGAGCUA--

```

### cel-miR-232:

```

1
cel-miR-232 -UAAAUGCAUC
cel-miR-256 UGGAAUGCAU-
cel-miR-357 -UAAAUGCCAG
dme-miR-277 -UAAAUGCACU
hsa-miR-302a -UAAGUGCUUC
hsa-miR-302b -UAAGUGCUUC
hsa-miR-302c -UAAGUGCUUC
hsa-miR-302d -UAAGUGCUUC
hsa-miR-519a -AAAGUGCAUC
hsa-miR-519b-3p -AAAGUGCAUC
hsa-miR-519c-3p -AAAGUGCAUC

```

### cel-miR-234:

```

1 23
cel-miR-234 UUAUUGCUCGAGAAUACCCUU--
dme-miR-137 -UAUUGCUGAGAAUACACGUAG
hsa-miR-137 UUAUUGCUGAAAGAAUACGCGUAG

1
cel-miR-234 --UUAUUGCUCG-
dme-miR-137 ---UAUUGCUGA
hsa-miR-126* CAUUAUUACU---
hsa-miR-137 --UUAUUGCUGA-

```

## cel-miR-235:

```
1                               22
cel-miR-235  UAUUGCACUCUCCCCGGCCUGA
dme-miR-311  UAUUGCACAUUCACCCGGCCUGA
dme-miR-310  UAUUGCACACUUCCCCGGCCUUU
dme-miR-312  UAUUGCACUUGACACCGGCCUGA
dme-miR-313  UAUUGCACUUUUCACAGCCCGA
hsa-miR-25   CAUUGCACUUGUCUCGGUCUGA
dme-miR-92a  CAUUGCACUUGUCCCCGCCUAU
hsa-miR-92a  UAUUGCACUUGUCCCCGCCUGU
dme-miR-92b  AAUUGCACUAGUCCCCGCCUGC
hsa-miR-92b  UAUUGCACUCGUCCCCGCCUCC
```

```
1
cel-miR-235  --UAUUGCACUC
dme-miR-310  --UAUUGCACAC
dme-miR-311  --UAUUGCACAU
dme-miR-312  --UAUUGCACUU
dme-miR-313  --UAUUGCACUU
dme-miR-92a  --CAUUGCACUU
dme-miR-92b  --AAUUGCACUA
hsa-miR-25   --CAUUGCACUU
hsa-miR-32   --UAUUGCACAU
hsa-miR-363  --AAUUGCACGG
hsa-miR-367  --AAUUGCACUU
hsa-miR-885-5p  UCCAUUACAC--
hsa-miR-92a  --UAUUGCACUU
hsa-miR-92b  --UAUUGCACUC
```

## cel-miR-236:

```
1                               23
cel-miR-236  UAAUACUGUCAGGUAAUGACCGCU
hsa-miR-200b UAAUACUGCCUGGUAAUGAUGA-
hsa-miR-200c UAAUACUGCCCGGUAAUGAUGGA
hsa-miR-141  UAAACACUGUCUGGUAAAGAUGG-
hsa-miR-200a UAAACACUGUCUGGUAACGAUGU-
dme-miR-8    UAAUACUGUCAGGUAAAGAUGUC
hsa-miR-429  UAAUACUGUCUGGUAAAACCGU-
```

```
1           10
cel-miR-236  UAAUACUGUC
dme-miR-8    UAAUACUGUC
```

```
hsa-miR-200b  UAAUACUGCC
hsa-miR-200c  UAAUACUGCC
hsa-miR-429   UAAUACUGUC
```

## cel-miR-237:

```
1
cel-miR-237  -UCCCUGAGAA
cel-lin-4    -UCCCUGAGAC
dme-miR-125  -UCCCUGAGAC
hsa-miR-125a-5p -UCCCUGAGAC
hsa-miR-125b -UCCCUGAGAC
hsa-miR-331-3p  GCCCCUGGGC-
```

## cel-miR-240:

```
1           10
cel-miR-240  UACUGGCCCC
dme-miR-193  UACUGGCCUA
hsa-miR-193a-3p AACUGGCCUA
hsa-miR-193b AACUGGCCCU
```

## cel-miR-241:

```
1
cel-miR-241  -UGAGGUAGGU
cel-let-7    -UGAGGUAGUA
cel-miR-48   -UGAGGUAGGC
cel-miR-793  -UGAGGUAUCU
cel-miR-794  -UGAGGUAAUUC
cel-miR-795  -UGAGGUAGAU
cel-miR-84   -UGAGGUAGUA
dme-let-7    -UGAGGUAGUA
dme-miR-963  ACAAGGUAAA-
dme-miR-977  -UGAGUAUAUUC
dme-miR-984  -UGAGGUAAAU
hsa-let-7a   -UGAGGUAGUA
hsa-let-7b   -UGAGGUAGUA
hsa-let-7c   -UGAGGUAGUA
hsa-let-7d   -AGAGGUAGUA
hsa-let-7e   -UGAGGUAGGA
hsa-let-7f   -UGAGGUAGUA
hsa-let-7g   -UGAGGUAGUA
hsa-let-7i   -UGAGGUAGUA
hsa-miR-98   -UGAGGUAGUA
```

### cel-miR-244:

```
1           10
cel-miR-244  UCUUUGGUUG
dme-miR-9c  UCUUUGGUAU
dme-miR-9b  UCUUUGGUCA
dme-miR-9a  UCUUUGGUUA
hsa-miR-9   UCUUUGGUUA
```

### cel-miR-245:

```
1           23
cel-miR-245  AUUGGUCCCCUCCAAGUAGCUC-
dme-miR-133  -UUGGUCCCCUUAACCAGCUGU
hsa-miR-133a UUUGGUCCCCUUAACCAGCUG-
hsa-miR-133b UUUGGUCCCCUUAACCAGCUA-
```

```
1
cel-miR-245  AUUGGUCCCC-
dme-miR-133  -UUGGUCCCCU
hsa-miR-133a UUUGGUCCCC-
hsa-miR-133b UUUGGUCCCC-
```

### cel-miR-247:

```
1
cel-miR-247  --UGACUAGAGC
cel-miR-61   --UGACUAGAAC
cel-miR-44   --UGACUAGAGA
cel-miR-45   --UGACUAGAGA
dme-miR-279  --UGACUAGAUC
dme-miR-286  --UGACUAGACC
dme-miR-996  --UGACUAGAUU
hsa-miR-134  UGUGACUCGU--
hsa-miR-708* --CAACUAGACU
```

### cel-miR-250:

```
1
cel-miR-250  --AAUCACAGUC--
cel-miR-2    --UAUCACAGCC--
cel-miR-43   --UAUCACAGUU--
cel-miR-797  --UAUCACAGCA--
dme-miR-11   --CAUCACAGUC--
dme-miR-13a  --UAUCACAGCC--
dme-miR-13b  --UAUCACAGCC--
dme-miR-2a   --UAUCACAGCC--
dme-miR-2b   --UAUCACAGCC--
dme-miR-2c   --UAUCACAGCC--
dme-miR-308  --AAUCACAGGA--
dme-miR-6    --UAUCACAGUG--
hsa-miR-128   ----UCACAGUGAA
hsa-miR-27a   ---UUCACAGUGG-
hsa-miR-27b   ---UUCACAGUGG-
hsa-miR-499-3p AACAUACAG----
hsa-miR-768-3p ----UCACAAUGCU
```

### cel-miR-251:

```
1
cel-miR-251  -UUAAGUAGUG
cel-miR-252  -AUAAGUAGUA
dme-miR-1002 -UUAAGUAGUG
hsa-miR-26a  UUCAAGUAAU-
hsa-miR-26b  UUCAAGUAAU-
```

### cel-miR-252:

```
1
cel-miR-252  -AUAAGUAGUA
cel-miR-251  -UUAAGUAGUG
dme-miR-1002 -UUAAGUAGUG
hsa-miR-26a  UUCAAGUAAU-
hsa-miR-26b  UUCAAGUAAU-
```

### cel-miR-256:

```
1                               22
cel-miR-256  UGGAAUGCAUAGAAGACUGUA-
cel-miR-1    UGGAAUGUAAAGAAGUAUGUA-
dme-miR-1    UGGAAUGUAAAGAAGUAUGGAG
hsa-miR-1    UGGAAUGUAAAGAAGUAUGUAU
```

```
1
cel-miR-256  UGGAAUGCAU-
cel-miR-1    UGGAAUGUAA-
cel-miR-796  UGGAAUGUAG-
dme-miR-1    UGGAAUGUAA-
hsa-miR-1    UGGAAUGUAA-
hsa-miR-206  UGGAAUGUAA-
hsa-miR-122  UGGAAUGUGA-
cel-miR-232  -UAAAUAGCAUC
dme-miR-277  -UAAAUAGCACU
hsa-miR-519a -AAAACUGCAUC
hsa-miR-519b-3p -AAAACUGCAUC
hsa-miR-519c-3p -AAAACUGCAUC
```

### cel-miR-259:

```
1           10
cel-miR-259  AAAUCUCAUC
dme-miR-304  UAAUCUCAAU
hsa-miR-216a UAAUCUCAGC
hsa-miR-216b AAAUCUCUGC
```

### cel-miR-266:

```
1
cel-miR-266  AGGCAAGACU-
cel-miR-269  -GGCAAGACUC
cel-miR-268  -GGCAAGAAUU
cel-miR-74   UGGCAAGAAA-
cel-miR-72   AGGCAAGAUG-
hsa-miR-31   AGGCAAGAUG-
cel-miR-73   UGGCAAGAUG-
dme-miR-31a  UGGCAAGAUG-
dme-miR-31b  UGGCAAGAUG-
```

### cel-miR-267:

```
1
cel-miR-267  --CCCGUGAAGU
cel-miR-51   UACCCGUAGC--
cel-miR-54   UACCCGUAAU--
cel-miR-56   UACCCGUAAU--
dme-miR-100  AACCCGUAAA--
hsa-miR-100  AACCCGUAGA--
hsa-miR-99a  AACCCGUAGA--
hsa-miR-99b  CACCCGUAGA--
```

### cel-miR-268:

```
1
cel-miR-266  AGGCAAGACU--
cel-miR-269  -GGCAAGACUC-
cel-miR-268  -GGCAAGAAUU-
cel-miR-74   UGGCAAGAAA--
hsa-miR-873  --GCAGGAACUU
cel-miR-72   AGGCAAGAUG--
hsa-miR-31   AGGCAAGAUG--
cel-miR-73   UGGCAAGAUG--
dme-miR-31a  UGGCAAGAUG--
dme-miR-31b  UGGCAAGAUG--
```

### cel-miR-269:

```
1
cel-miR-266  AGGCAAGACU-
cel-miR-269  -GGCAAGACUC
cel-miR-268  -GGCAAGAAUU
cel-miR-74   UGGCAAGAAA-
cel-miR-72   AGGCAAGAUG-
hsa-miR-31   AGGCAAGAUG-
cel-miR-73   UGGCAAGAUG-
dme-miR-31a  UGGCAAGAUG-
dme-miR-31b  UGGCAAGAUG-
```

### cel-miR-273:

```
1           10
cel-miR-273  UGCCCCGUACU
cel-miR-54  UACCCGUAAU
cel-miR-56  UACCCGUAAU
cel-miR-51  UACCCGUAGC
cel-miR-55  UACCCGUAUA
cel-miR-52  CACCCGUACA
cel-miR-53  CACCCGUACA
hsa-miR-99b CACCCGUACA
dme-miR-100 AACCCGUAAA
hsa-miR-100 AACCCGUACA
hsa-miR-99a AACCCGUACA
```

### cel-miR-357:

```
1           10
cel-miR-357  UAAAUGCCAG
dme-miR-277  UAAAUGCACU
cel-miR-232  UAAAUGCAUC
hsa-miR-302a UAAGUGCUUC
hsa-miR-302b UAAGUGCUUC
hsa-miR-302c UAAGUGCUUC
hsa-miR-302d UAAGUGCUUC
```

### cel-miR-785:

```
1
cel-miR-785  -UAAGUCAAUJ
cel-miR-86   -UAAGUCAAUJ
dme-miR-987  UAAGUAAAU-
hsa-miR-545* -UCAGUAAAUG
hsa-miR-559  UAAGUAAAU-
```

### cel-miR-787:

```
1
cel-miR-787  --UAAGUCGUU
cel-miR-231  --UAAGUCGUG
dme-miR-993  --GAAGUCGUC
hsa-miR-556-5p GAUCAGCUCA--
hsa-miR-99a* --CAAGCUCGCU
hsa-miR-99b* --CAAGCUCGUG
```

### cel-miR-790:

```
1
cel-miR-790  CUUGGCACUC--
cel-miR-228  AAUGGCACUG--
cel-miR-229  AAUGACACUG--
cel-miR-63   UAUGACACUG--
cel-miR-64   UAUGACACUG--
cel-miR-65   UAUGACACUG--
cel-miR-66   CAUGACACUG--
cel-miR-791  UUUGGCACUC--
dme-miR-263b CUUGGCACUG--
hsa-miR-183  UAUGGCACUG--
hsa-miR-200a --UAACACUGUC
hsa-miR-514  AUUGACACUU--
hsa-miR-96   UUUGGCACUA--
```

### cel-miR-791:

```
1
cel-miR-791  UUUGGCACUC--
cel-miR-228  AAUGGCACUG--
cel-miR-229  AAUGACACUG--
cel-miR-63   UAUGACACUG--
cel-miR-64   UAUGACACUG--
cel-miR-65   UAUGACACUG--
cel-miR-66   CAUGACACUG--
hsa-miR-514  AUUGACACUU--
hsa-miR-200a --UAACACUGUC
hsa-miR-183  UAUGGCACUG--
dme-miR-263b CUUGGCACUG--
hsa-miR-96   UUUGGCACUA--
hsa-miR-182  UUUGGCAAUG--
cel-miR-790  CUUGGCACUC--
```

### cel-miR-793:

|             | 1          | 10  |
|-------------|------------|-----|
| cel-miR-793 | UGAGGUA    | UCU |
| cel-let-7   | UGAGGUAGUA |     |
| cel-miR-241 | UGAGGUAG   | GU  |
| cel-miR-48  | UGAGGUAG   | GC  |
| cel-miR-794 | UGAGGUA    | AUC |
| cel-miR-795 | UGAGGUAGA  | AU  |
| cel-miR-84  | UGAGGUAGUA |     |
| dme-let-7   | UGAGGUAGUA |     |
| dme-miR-977 | UGAGAUAU   | UUC |
| dme-miR-984 | UGAGGUA    | AAU |
| hsa-let-7a  | UGAGGUAGUA |     |
| hsa-let-7b  | UGAGGUAGUA |     |
| hsa-let-7c  | UGAGGUAGUA |     |
| hsa-let-7e  | UGAGGUAG   | CA  |
| hsa-let-7f  | UGAGGUAGUA |     |
| hsa-let-7g  | UGAGGUAGUA |     |
| hsa-let-7i  | UGAGGUAGUA |     |
| hsa-miR-202 | AGAGGUA    | UAG |
| hsa-miR-98  | UGAGGUAGUA |     |

### cel-miR-794:

|             | 1          |      |
|-------------|------------|------|
| cel-miR-794 | UGAGGUA    | AUC  |
| cel-let-7   | UGAGGUAGUA |      |
| cel-miR-241 | UGAGGUAG   | GU   |
| cel-miR-48  | UGAGGUAG   | GC   |
| cel-miR-793 | UGAGGUA    | UCU  |
| cel-miR-795 | UGAGGUAGA  | AU   |
| cel-miR-84  | UGAGGUAGUA |      |
| dme-let-7   | UGAGGUAGUA |      |
| dme-miR-963 | ACAAGGUA   | AA-- |
| dme-miR-977 | UGAGAUAU   | UUC  |
| dme-miR-984 | UGAGGUA    | AAU  |
| hsa-let-7a  | UGAGGUAGUA |      |
| hsa-let-7b  | UGAGGUAGUA |      |
| hsa-let-7c  | UGAGGUAGUA |      |
| hsa-let-7d  | AGAGGUAGUA |      |
| hsa-let-7e  | UGAGGUAG   | CA   |
| hsa-let-7f  | UGAGGUAGUA |      |
| hsa-let-7g  | UGAGGUAGUA |      |

|              |            |
|--------------|------------|
| hsa-let-7i   | UGAGGUAGUA |
| hsa-miR-196a | UAGGUAGUUU |
| hsa-miR-98   | UGAGGUAGUA |

### cel-miR-795:

|             | 1          |      |
|-------------|------------|------|
| cel-miR-795 | UGAGGUAGA  | U-   |
| cel-miR-241 | UGAGGUAG   | GU-  |
| cel-miR-48  | UGAGGUAG   | GC-  |
| cel-let-7   | UGAGGUAGUA |      |
| cel-miR-84  | UGAGGUAGUA |      |
| dme-let-7   | UGAGGUAGUA |      |
| hsa-let-7a  | UGAGGUAGUA |      |
| hsa-let-7b  | UGAGGUAGUA |      |
| hsa-let-7c  | UGAGGUAGUA |      |
| hsa-let-7d  | AGAGGUAGUA |      |
| hsa-let-7e  | UGAGGUAG   | CA-  |
| hsa-let-7f  | UGAGGUAGUA |      |
| cel-miR-793 | UGAGGUA    | UCU- |
| hsa-let-7g  | UGAGGUAGUA |      |
| hsa-let-7i  | UGAGGUAGUA |      |
| cel-miR-794 | UGAGGUA    | AUC  |
| hsa-miR-98  | UGAGGUAGUA |      |
| dme-miR-984 | UGAGGUA    | AAU- |
| dme-miR-963 | ACAAGGUA   | AA-- |
| dme-miR-977 | UGAGAUAU   | UUC- |

### cel-miR-796:

|             | 1          | 10 |
|-------------|------------|----|
| cel-miR-1   | UGGAAUGUAA |    |
| cel-miR-256 | UGGAAUGCAU |    |
| cel-miR-796 | UGGAAUGUAG |    |
| dme-miR-1   | UGGAAUGUAA |    |
| hsa-miR-1   | UGGAAUGUAA |    |
| hsa-miR-122 | UGGAGUGUGA |    |
| hsa-miR-206 | UGGAAUGUAA |    |

### cel-miR-797:

```
1
cel-miR-797 --UAUCACAGCA
cel-miR-250 --AAUCACAGUC
dme-miR-308 --AAUCACAGGA
dme-miR-11 --CAUCACAGUC
hsa-miR-499-3p AACAUACAG--
cel-miR-43 --UAUCACAGUU
dme-miR-6 --UAUCACAGUG
cel-miR-2 --UAUCACAGCC
dme-miR-13a --UAUCACAGCC
dme-miR-13b --UAUCACAGCC
dme-miR-2a --UAUCACAGCC
dme-miR-2b --UAUCACAGCC
dme-miR-2c --UAUCACAGCC
```

### cel-miR-1018:

```
1
cel-miR-1018 AGAGAGAUCA---
cel-miR-81 --UGAGAUCAUC--
cel-miR-82 --UGAGAUCAUC--
cel-miR-80 --UGAGAUCAUU--
cel-miR-58 --UGAGAUCAUU--
dme-bantam --UGAGAUCAUU--
cel-miR-1022 ---AAGAUCAUUG
hsa-miR-450b-3p -UUGGAUCAU--
```

### cel-miR-1022:

```
1
cel-miR-1022 ---AAGAUCAUUG
cel-miR-1018 AGAGAGAUCA---
cel-miR-81 --UGAGAUCAUC--
cel-miR-82 --UGAGAUCAUC--
dme-miR-306* --GGGGAUCAU--
hsa-miR-450b-3p -UUGGAUCAU--
cel-miR-80 --UGAGAUCAUU--
cel-miR-58 --UGAGAUCAUU--
dme-bantam --UGAGAUCAUU--
```
