# Supplementary material for: Sequence Relationships among C. elegans, D. melanogaster and Human microRNAs Highlight the Extensive Conservation of microRNAs in Biology
Source: PubMed Central journal article supplement (PMC2486268; doi:10.1371/journal.pone.0002818), 2008-07-30

**A**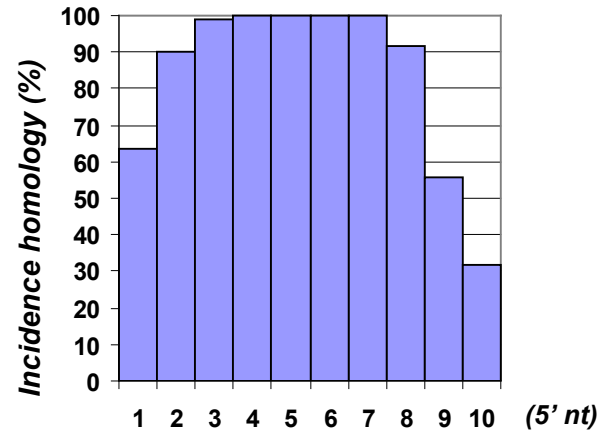**B**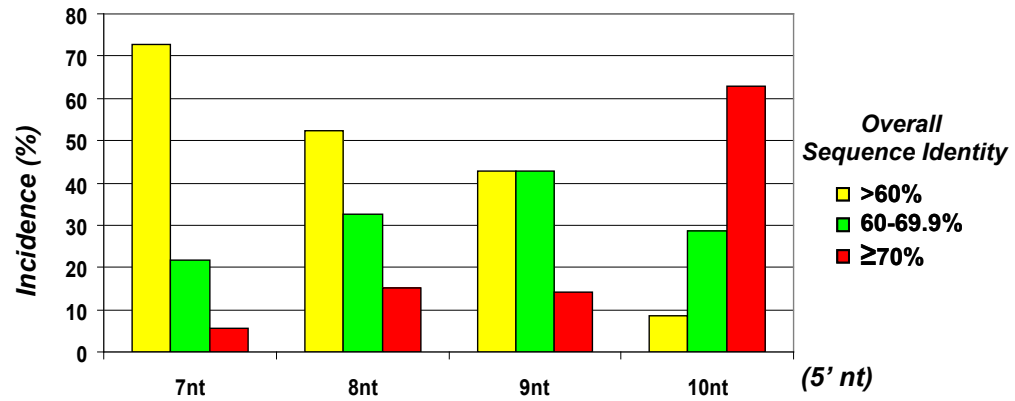

Supplement: pone.0002818.s002.pdf [file pone.0002818.s002.pdf]
